# Supplementary material
Source: publisher site journal article supplement (http://kjim.org/upload/media/kjim-2019-358-suppl2.pdf)
Supplement: Supplementary file 1 [file kjim-2019-358-suppl2.pdf]

**Supplementary Table 2. Incidence of ever lymphopenia (ALC < 1,000/ $\mu$ L, n = 1,222) according to cancer stage and neutropenia**

| Variable                      | Ever lymphopenia (%) |
|-------------------------------|----------------------|
| Stage I                       | 172/905 (19.0)       |
| Stage II                      | 58/169 (34.3)        |
| Stage III                     | 73/148 (49.3)        |
| Ever neutropenia <sup>a</sup> | 43/74 (58.1)         |
| Never neutropenia             | 260/1,148 (22.6)     |

ALC, absolute lymphocyte count.

<sup>a</sup>Definition of ever neutropenia: absolute neutrophil count < 1,000/ $\mu$ L.
